# Supplementary material
Source: publisher site journal article supplement (https://www.dovepress.com/article/255675)
Supplement: Supplementary file 1 [file get_supplementary_file.php]

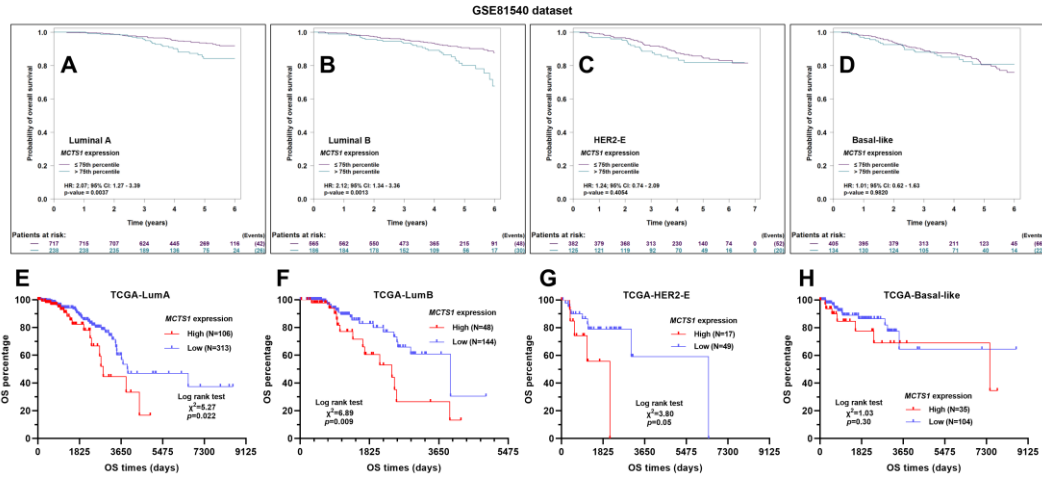

### Supplementary Fig. 1. K-M OS curves in PAM50 subtypes of breast cancer

K-M OS curves in PAM50 subtypes of breast cancer. OS data was collected from GSE81540 (A-D) and TCGA-BRCA (E-H). Subgroup analysis was conducted in luminal A (A and E), luminal B (B and F), HER2-E (C and G) and basal-like (D and H) cases respectively. Patients were separated into two groups by 75<sup>th</sup> percentile of *MCTS1* expression.

### Supplementary Table 1. Univariate analysis of the prognostic value of *MCTS1* expression in HER2-E and basal-like patients

| Subtypes/Parameters                  | Univariate analysis |       |                     |
|--------------------------------------|---------------------|-------|---------------------|
|                                      | <i>p</i>            | HR    | 95%CI (lower/upper) |
| <b>HER2-E</b>                        |                     |       |                     |
| <i>MCTS1</i> expression (Continuous) | 0.098               | 2.399 | 0.851 - 6.759       |
| <b>Basal-like</b>                    |                     |       |                     |
| <i>MCTS1</i> expression (Continuous) | 0.608               | 1.242 | .542 - 2.843        |
